# Supplementary material for: Efficient photocatalytic performance and the mechanism of copper(i) metal–organic framework nanosheets
Source: Royal Society of Chemistry journal article supplement (doi:10.1039/d3nj02728g), 2023-01-01

## Support information

### Efficient Photocatalytic Performance and Mechanism of Copper(I)

#### Metal–Organic Framework Nanosheets

Shaolong Yang<sup>1,2</sup>, Yuhuan Chen<sup>1</sup>, Shixiong Li<sup>1,2\*</sup>, Huijun Chen<sup>3\*</sup>

<sup>1</sup>School of Mechanical and Resource Engineering, Wuzhou University, Wuzhou 543002, P. R. China

<sup>2</sup>School of Chemistry and Chemical Engineering, Guangxi University, Nanning, 530004, P. R. China

<sup>3</sup>School of Food and Pharmaceutical Engineering, Wuzhou University, Wuzhou 543002, P. R. China

\*E-mail:lsx1324@163.com; chj\_chem@163.com

## Contents

|                                                                                                                                                                                                                               |    |
|-------------------------------------------------------------------------------------------------------------------------------------------------------------------------------------------------------------------------------|----|
| Instrument and characterization analysis conditions.....                                                                                                                                                                      | 1  |
| Figure S1. The EPR of <b>1</b> . .....                                                                                                                                                                                        | 2  |
| Figure S2. (a) and (b) AFM of nanosheets.....                                                                                                                                                                                 | 2  |
| Figure S3. N <sub>2</sub> adsorption/desorption isotherm of nanosheets. ....                                                                                                                                                  | 3  |
| Figure S4. Cyclic voltammetry curve of nanosheets. ....                                                                                                                                                                       | 3  |
| Figure S5. Adsorption performance: (a) and (b) adsorption properties of MB by nanosheets, and P <sub>25</sub> , respectively; (c) and (d) adsorption properties of MO by nanosheets, and P <sub>25</sub> , respectively. .... | 4  |
| Figure S6. XRD of nanosheets after photocatalytic degradation of MB and MO. ....                                                                                                                                              | 4  |
| Figure S7. IR of nanosheets after photocatalytic degradation of MB, and MO.....                                                                                                                                               | 5  |
| Figure S8. XPS of nanosheets after photocatalytic degradation of MB, and MO. ....                                                                                                                                             | 5  |
| Figure S9. (a) And (b) are the cyclic experiments of nanosheets photocatalytic MB and MO, respectively; (c) and (d) are the cyclic experiments of P <sub>25</sub> photocatalytic MB and MO, respectively. ....                | 6  |
| Figure S10. <i>In-situ</i> EPR spectrum of nanosheets sample under 175 W high-pressure mercury lamp radiation catalyzed the MB at 173 K.....                                                                                  | 6  |
| Figure S11. The ·OH active species captured by EPR.....                                                                                                                                                                       | 7  |
| Figure S12. ESI-MS test and analysis of MB solution during photocatalytic process. ....                                                                                                                                       | 7  |
| Figure S13. ESI-MS test and analysis of MB solution during photocatalytic process. ....                                                                                                                                       | 8  |
| Table S1. Crystallographic Data of <b>1</b> .....                                                                                                                                                                             | 9  |
| Table S2. Selected Bond Lengths (nm) and Bond Angles (°) for <b>1</b> .....                                                                                                                                                   | 9  |
| Table S4. The kinetic investigation for nanosheets, and P <sub>25</sub> .....                                                                                                                                                 | 10 |
| Table S5. The zeta potential vs. pH curves of nanosheets of <b>1</b> , and P <sub>25</sub> .....                                                                                                                              | 10 |
| Table S6. Calculation of the frontier electron density of atoms in MB molecules by DFT analysis                                                                                                                               | 11 |
| Table S7. Calculation of the frontier electron density of atoms in MO molecules by DFT analysis                                                                                                                               | 12 |

## Instrument and characterization analysis conditions

The IR spectra of **1** was measured on a Nicolet 5DX FT-IR spectrometer with KBr pellets. The Elemental analysis (carbon, hydrogen, and nitrogen) of **1** was performed with a Perkin-Elmer 240 elemental analyzer. The X-ray powder diffraction of **1** was carried out using Rigaku's D/max 2500 X-ray diffractometer with Cu K $\alpha$  radiation ( $\lambda = 0.15604$  nm); the tube voltage was 40 kV, the tube current was 150 mA, a graphite monochromator was used, and  $2\theta$  was  $5^\circ$  to  $50^\circ$ . The X-ray crystallography of **1** was collected on a Bruker Apex CCD area-detector diffractometer. The X-ray photoelectron spectroscopy (XPS) of **1** was performed on a Kratos Axis Ultra DLD system with a base pressure of  $10^{-9}$  Torr. The scanning electron microscopy (SEM) of **1** was performed by using the Hitachi S-4800 under the following conditions: Mag.: 1 KX, Signal A: VPSE, and EHT: 20 kV. The surface area of **1** was determined using BET technique; the apparatus (AutoChem II 2920) was employed to determine the surface area of the **1** using N $_2$  as the probe gas. The UV-Vis diffuse reflectance spectra of P $_{25}$  and **1** were measured by a UV-2700 instrument from Shimadzu of Japan with BaSO $_4$  as a reference. The electrochemical cyclic voltammetry of **1** was conducted on a CHI 410B Electrochemical Workstation with Pt disk coated with the polymer film, Pt plate, and Ag/Ag $^+$  electrode as working electrode, counter electrode, and reference electrode respectively in a 0.1 mol/L tetrabutylammonium hexafluorophosphate (Bu $_4$ NPF $_6$ ) acetonitrile solution. The electrochemical potential was calibrated against Fc/Fc $^+$ . Measure the pH value in the solution by using the Mettler FE28 Standard pH meter. The concentration of MB and MO in solution were measured with UV-Vis 2550 in 664 nm and 466 nm wavelength, respectively.

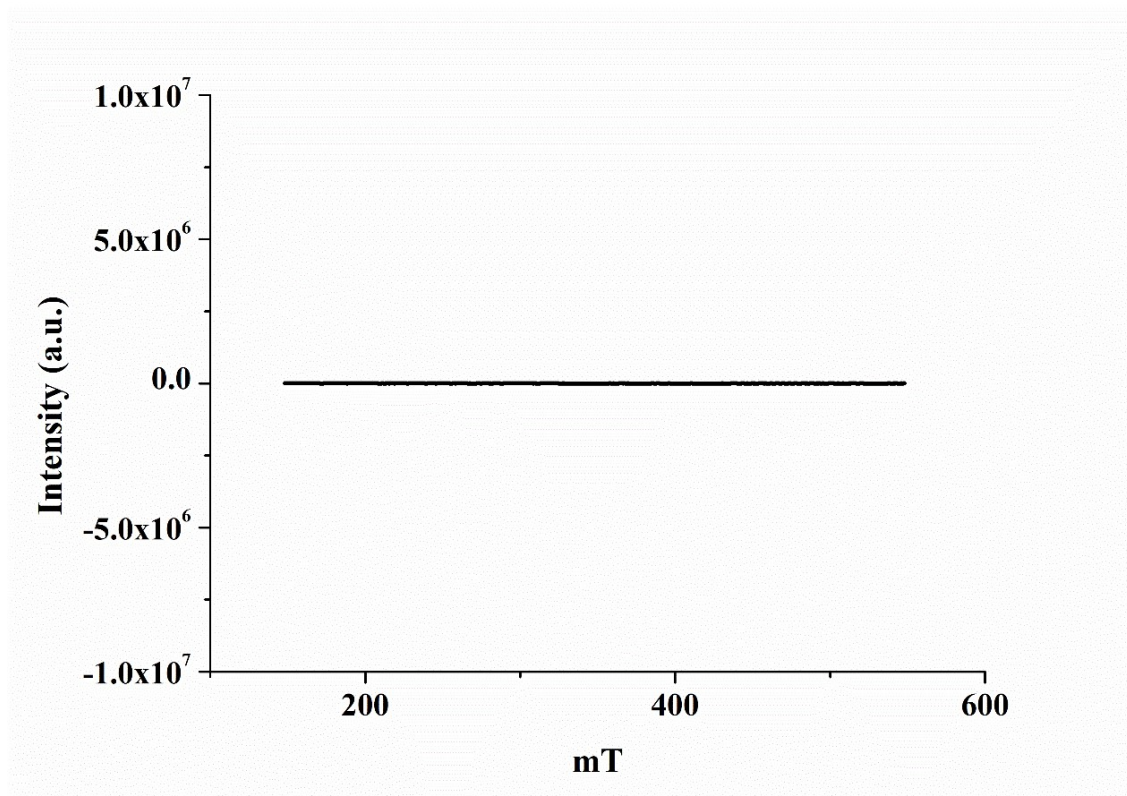

Figure S1. The EPR of 1.

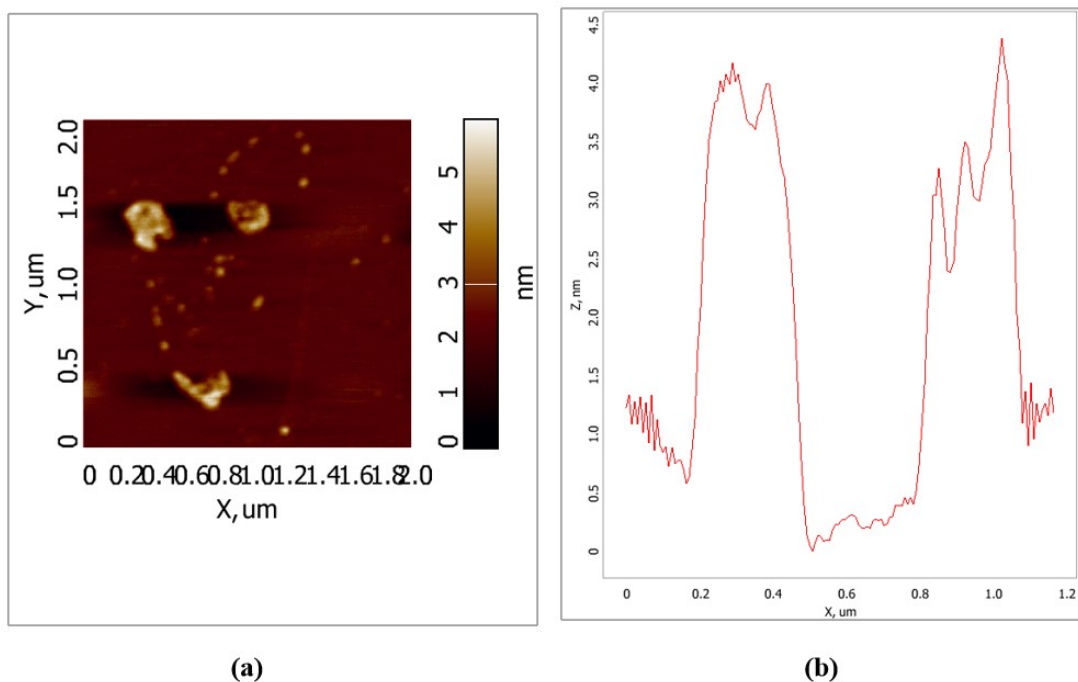

Figure S2. (a) and (b) AFM of nanosheets.

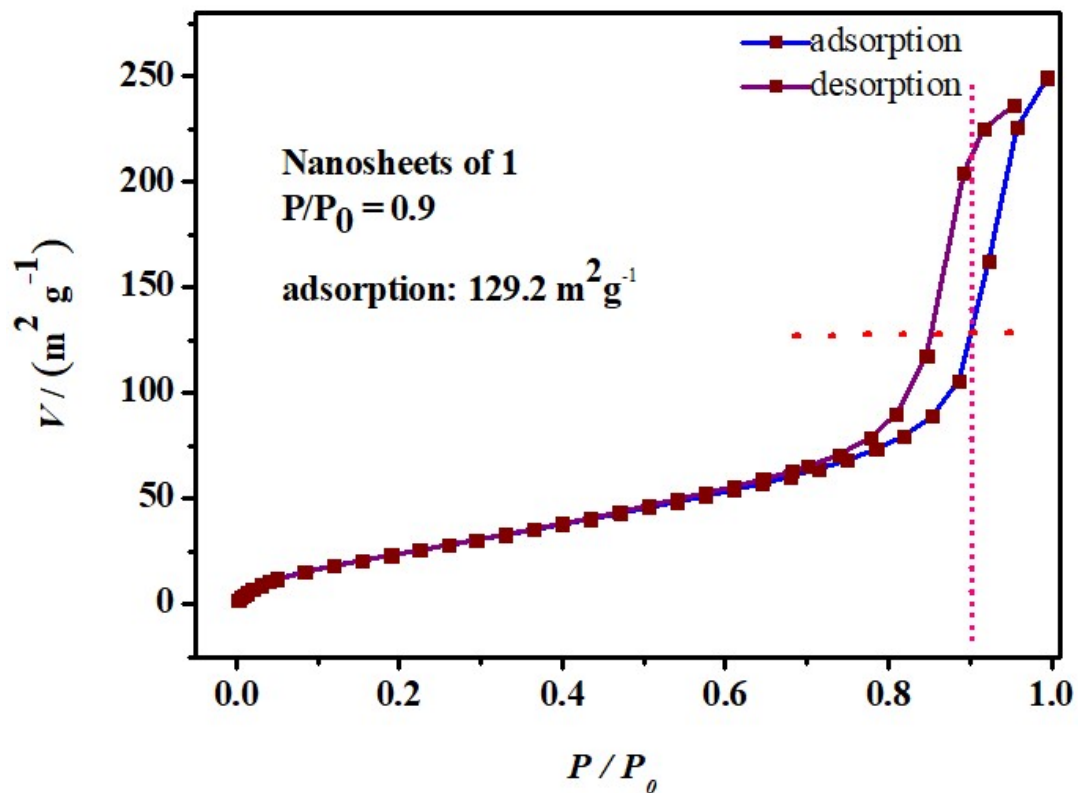

Figure S3.  $\text{N}_2$  adsorption/desorption isotherm of nanosheets.

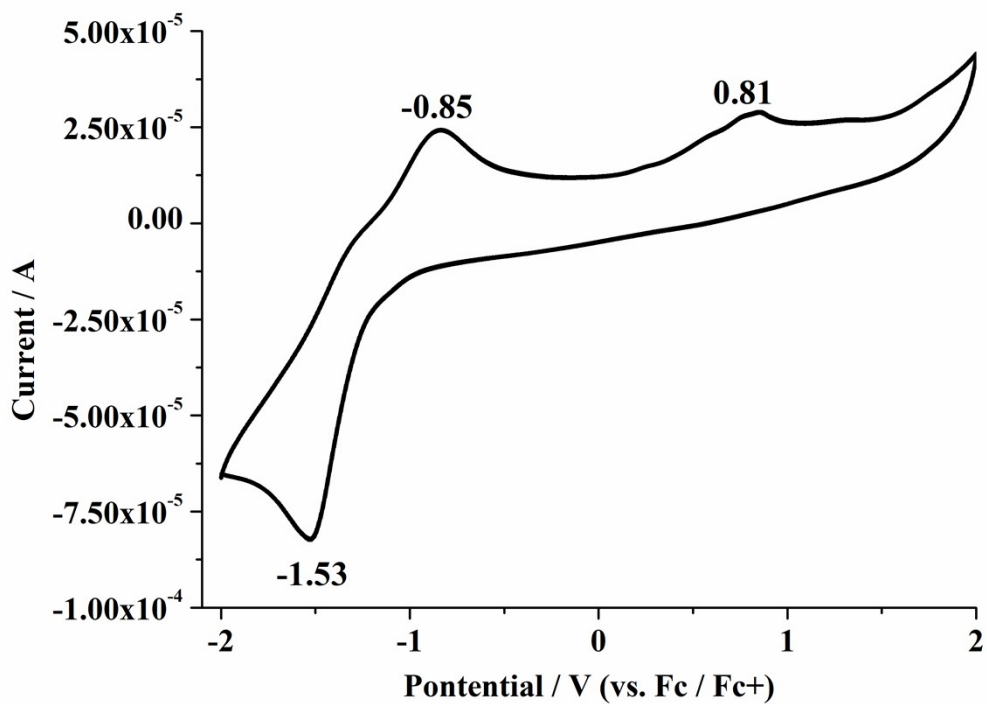

Figure S4. Cyclic voltammetry curve of nanosheets.

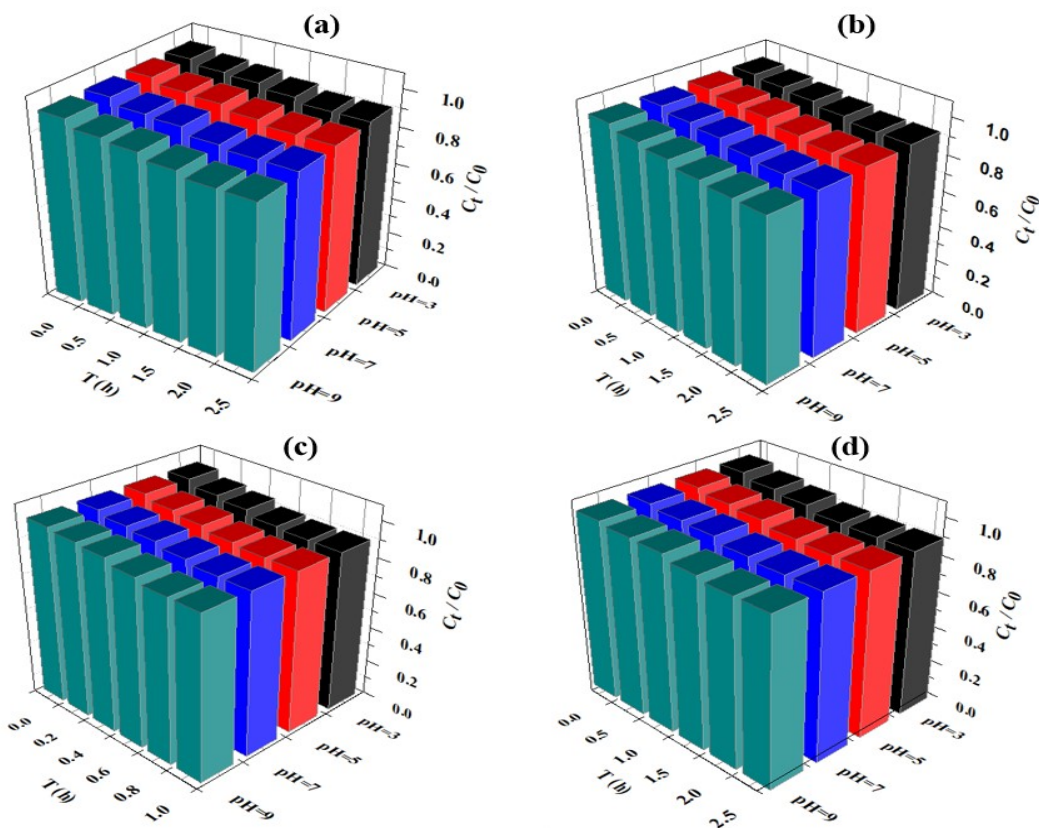

**Figure S5.** Adsorption performance: (a) and (b) adsorption properties of MB by nanosheets, and  $P_{25}$ , respectively; (c) and (d) adsorption properties of MO by nanosheets, and  $P_{25}$ , respectively.

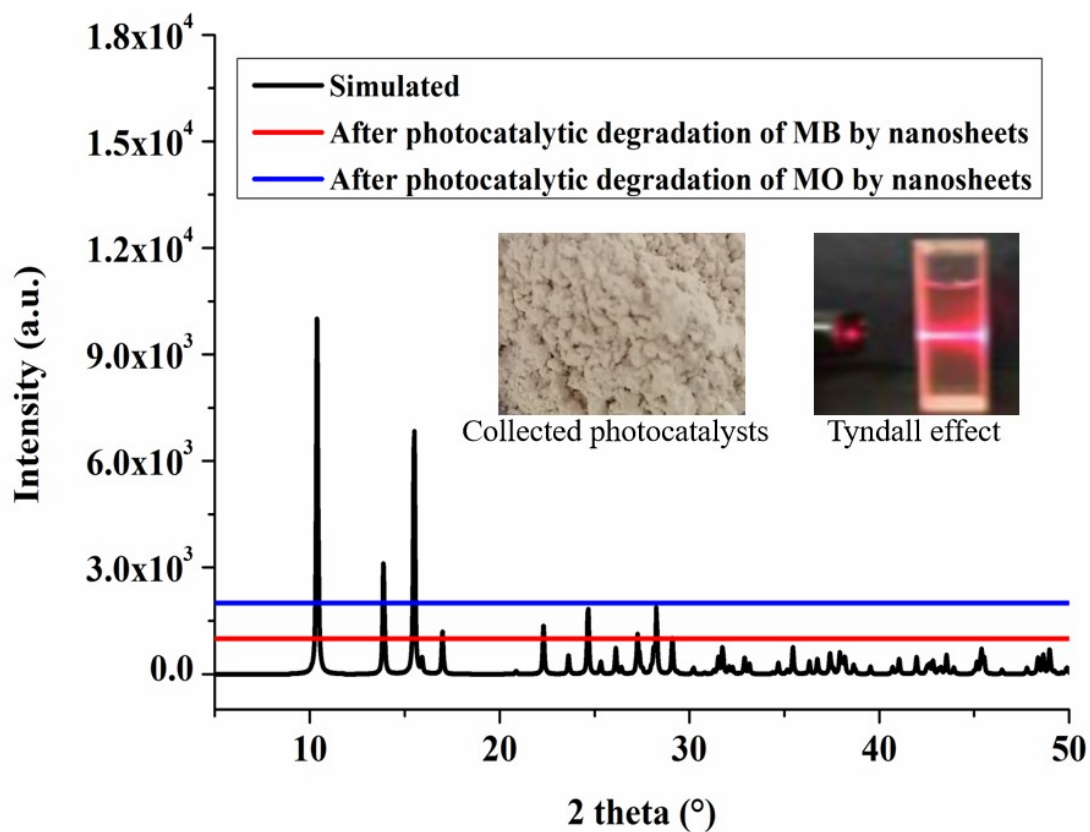

**Figure S6.** XRD of nanosheets after photocatalytic degradation of MB and MO.

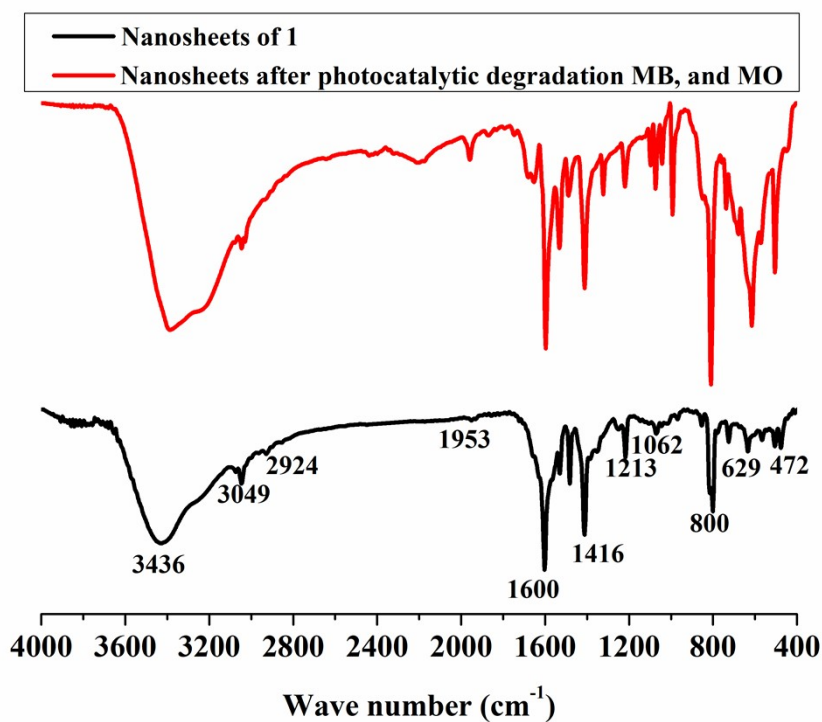

Figure S7. IR of nanosheets after photocatalytic degradation of MB, and MO.

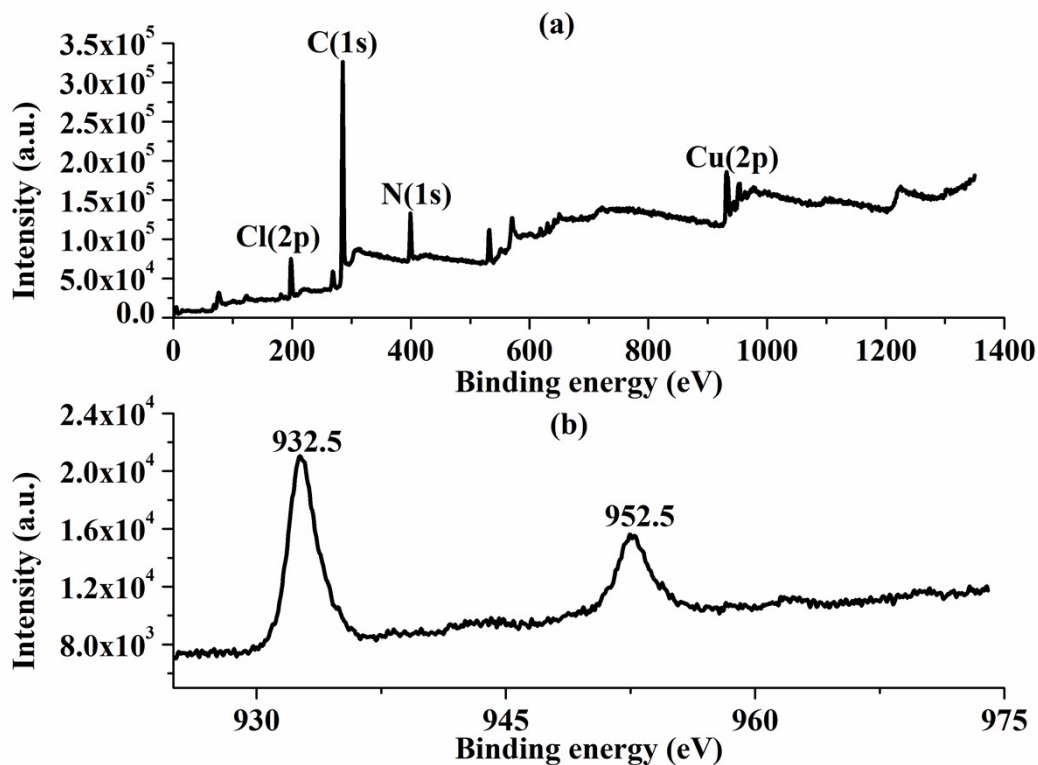

Figure S8. XPS of nanosheets after photocatalytic degradation of MB, and MO.

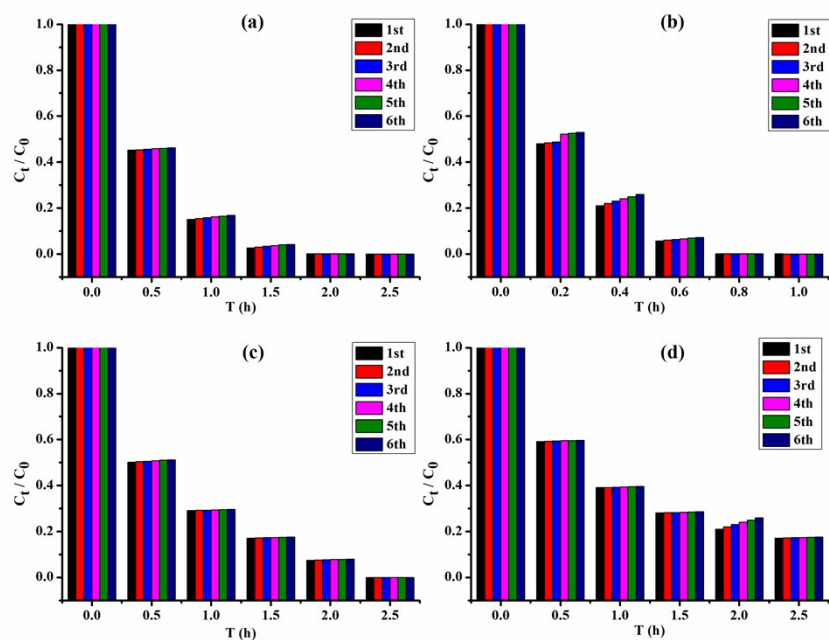

**Figure S9.** (a) and (b) are the cyclic experiments of nanosheets photocatalytic MB and MO, respectively; (c) and (d) are the cyclic experiments of P<sub>25</sub> photocatalytic MB and MO, respectively.

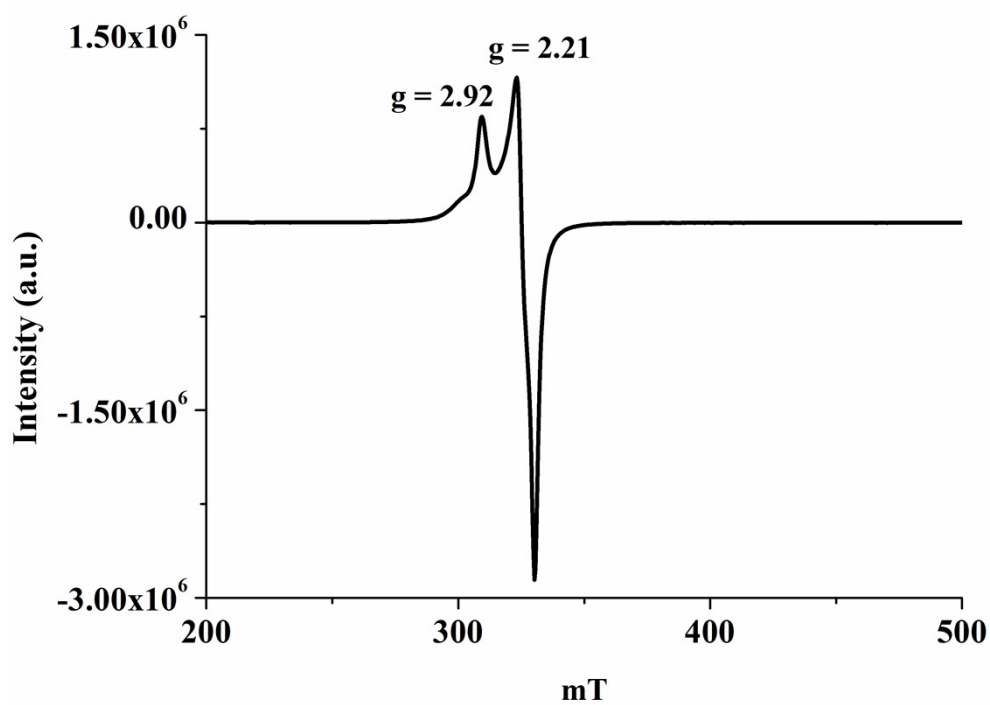

**Figure S10.** *In-situ* EPR spectrum of nanosheets sample under 175 W high-pressure mercury lamp radiation catalyzed the MB at 173 K.



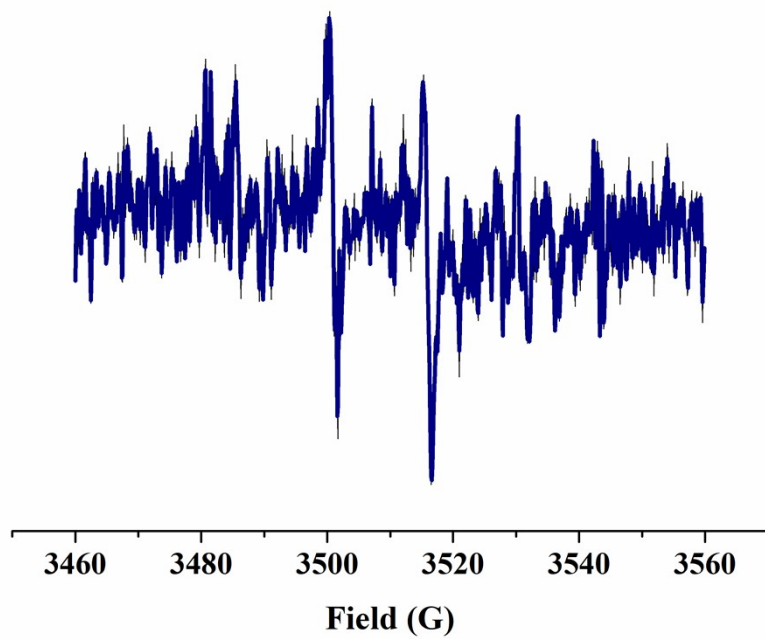

Figure S11. The  $\cdot\text{OH}$  active species captured by EPR.

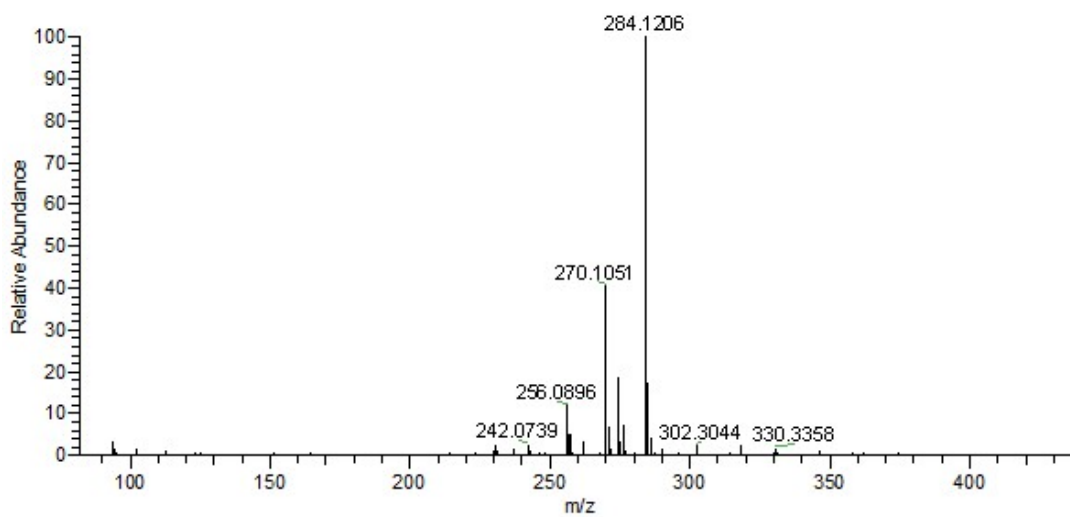

Figure S12. ESI-MS test and analysis of MB solution during photocatalytic process.

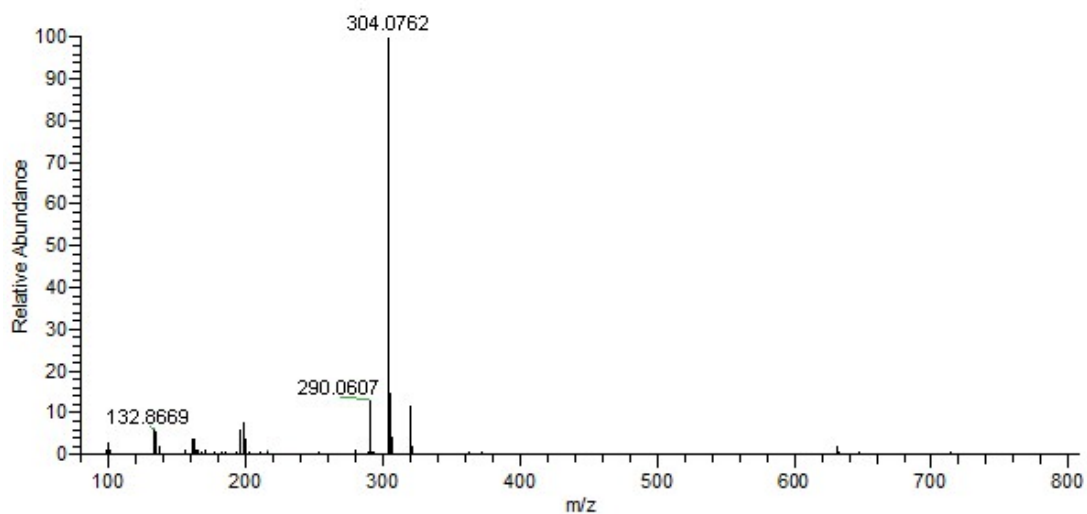

**Figure S13.** ESI-MS test and analysis of MB solution during photocatalytic process.

**Table S1.** Crystallographic Data of **1**.

| [Cu <sub>2</sub> ·L·Cl <sub>2</sub> ] <sub>n</sub> |                                                                               |                                      |                                                 |
|----------------------------------------------------|-------------------------------------------------------------------------------|--------------------------------------|-------------------------------------------------|
| Empirical formula                                  | C <sub>10</sub> H <sub>8</sub> Cl <sub>2</sub> Cu <sub>2</sub> N <sub>2</sub> | Z                                    | 2                                               |
| Formula weight                                     | 354.18                                                                        | Dcaled, (g/cm <sup>3</sup> )         | 2.141                                           |
| Temperature (K)                                    | 250                                                                           | S                                    | 1.66                                            |
| Wavelength (Å)                                     | 0.71073                                                                       | Limiting indices                     | -1 ≤ h ≤ 4; -15 ≤ k ≤ 15; -13 ≤ l ≤ 14          |
| Crystal system                                     | Monoclinic                                                                    | F(000)                               | 342.0644                                        |
| Space group                                        | P2 <sub>1</sub> /c                                                            | θ (°)                                | 5.2 to 73.5                                     |
| a (Å)                                              | 3.7727 (7)                                                                    | Refs collected total / unique        | 1084 / 919                                      |
| b (Å)                                              | 12.743 (3)                                                                    | (Δ/σ) <sub>max</sub>                 | 0.001                                           |
| c (Å)                                              | 11.4596 (19)                                                                  | Data/restraints/paramets             | 1084/ 0 / 73                                    |
| α (°)                                              | 90                                                                            | μ(mm <sup>-1</sup> )                 | 8.98                                            |
| β (°)                                              | 94.320 (17)°                                                                  | Final R indices; [I>2(I)]            | R <sub>1</sub> = 0.095; wR <sub>2</sub> = 0.253 |
| γ (°)                                              | 90                                                                            | Δρ <sub>max</sub> /Δρ <sub>min</sub> | 1.72 / -1.2                                     |
| Volume (Å <sup>3</sup> )                           | 549.34 (18)                                                                   | R <sub>(int)</sub>                   | 0.044                                           |

**Table S2.** Selected Bond Lengths (nm) and Bond Angles (°) for **1**.

| Bond            | Dist. (Å)   | Bond              | Dist. (Å)   | Bond              | Dist. (Å)   |
|-----------------|-------------|-------------------|-------------|-------------------|-------------|
| Cu(1)-C(1C)     | 2.4186(19)  | Cu1-Cl(1B)        | 2.493(2)    | Cu1-Cl(1)         | 2.2990(19)  |
| Cu(1)-N(1)      | 1.997 (6)   |                   |             |                   |             |
| Angle           | (°)         | Angle             | (°)         | Angle             | (°)         |
| N1-Cu(1)-Cl(1)  | 126.07 (17) | N(1)-Cu(1)-Cl(1C) | 106.64 (17) | N(1)-Cu(1)-Cl(1B) | 105.18 (17) |
| C(5)-N(1)-Cu(1) | 120.3 (5)   | C(1)-N(1)-Cu(1)   | 122.5 (4)   |                   |             |

Symmetry codes: (A) -x, -y+1, -z+1; (B) -x+1, -y+1, -z+1; (C) x-1, y, z;

**Table S3.** Characterization and analysis results of N<sub>2</sub> adsorption/desorption isotherms of nanosheets

| Parameter                 | Value                   | Parameter                    | Value                  |
|---------------------------|-------------------------|------------------------------|------------------------|
| Single point surface area | 28.2 m <sup>2</sup> /g  | BET Surface Area             | 129.2m <sup>2</sup> /g |
| Langmuir Surface Area     | 765.3 m <sup>2</sup> /g | t-Plot External Surface Area | 67.3m <sup>2</sup> /g  |
| Pore Volume               | 0.27 cm <sup>3</sup> /g | Pore Size                    | 27.4 nm                |

**Table S4.** The kinetic investigation for nanosheets, and P<sub>25</sub>

| Photocatalytic degradation of MB by nanosheets of <b>1</b> |                                       |                |
|------------------------------------------------------------|---------------------------------------|----------------|
| pH                                                         | Kinetics equation                     | R <sup>2</sup> |
| 3                                                          | $\ln(C_0/C_t) = -197.18 t + 271.25$   | 0.3725         |
| 5                                                          | $\ln(C_0/C_t) = -189.43 t + 241.79$   | 0.3177         |
| 7                                                          | $\ln(C_0/C_t) = -1.38 t + 2.3675$     | 0.6925         |
| 9                                                          | $\ln(C_0/C_t) = 0.4554 t + 0.4666$    | 0.8749         |
| Photocatalytic degradation of MB by P <sub>25</sub>        |                                       |                |
| 3                                                          | $\ln(C_0/C_t) = -1902.74 t + 2493.75$ | 0.2869         |
| 5                                                          | $\ln(C_0/C_t) = -0.0005 t + 0.9742$   | 0.8152         |
| 7                                                          | $\ln(C_0/C_t) = 0.72225 t + 0.30524$  | 0.8894         |
| 9                                                          | $\ln(C_0/C_t) = 1.05346 t + 0.03268$  | 0.9757         |
| Photocatalytic degradation of MO by nanosheets of <b>1</b> |                                       |                |
| 3                                                          | $\ln(C_0/C_t) = -197.61 t + 277.36$   | 0.3509         |
| 5                                                          | $\ln(C_0/C_t) = -189.61 t + 241.82$   | 0.3178         |
| 7                                                          | $\ln(C_0/C_t) = -1.511 t + 2.39103$   | 0.6915         |
| 9                                                          | $\ln(C_0/C_t) = 0.40921 t + 0.5423$   | 0.8278         |
| Photocatalytic degradation of MO by P <sub>25</sub>        |                                       |                |
| 3                                                          | $\ln(C_0/C_t) = 0.77452 t + 0.13741$  | 0.9895         |
| 5                                                          | $\ln(C_0/C_t) = 1.07025 t + 0.09851$  | 0.9769         |
| 7                                                          | $\ln(C_0/C_t) = 1.06173 t + 0.07245$  | 0.9651         |
| 9                                                          | $\ln(C_0/C_t) = 0.99254 t + 0.02169$  | 0.9897         |

**Table S5.** The zeta potential vs. pH curves of nanosheets of **1**, and P<sub>25</sub>

| pH | Nanosheets of <b>1</b> | P <sub>25</sub> |
|----|------------------------|-----------------|
| 3  | 33.88                  | 18.84           |
| 5  | 21.52                  | 5.81            |
| 7  | 9.43                   | -7.84           |
| 9  | -3.21                  | -22.35          |

**Table S6.** Calculation of the frontier electron density of atoms in MB molecules by DFT analysis

| Atomic number in MB | $2\text{FED}_{\text{HOMO}}^2$ | $\text{FED}_{\text{HOMO}}^2 + \text{FED}_{\text{LUMO}}^2$ |
|---------------------|-------------------------------|-----------------------------------------------------------|
| C(1)                | 0.0025                        | 0.0937                                                    |
| C(2)                | 0.0076                        | 0.0780                                                    |
| C(3)                | 0.0844                        | 0.0525                                                    |
| C(4)                | 0.0981                        | 0.2257                                                    |
| C(5)                | 0.0260                        | 0.0167                                                    |
| C(6)                | 0.0009                        | 0.0799                                                    |
| C(7)                | 0.0981                        | 0.2258                                                    |
| C(8)                | 0.0844                        | 0.0525                                                    |
| C(9)                | 0.0076                        | 0.0780                                                    |
| C(10)               | 0.0025                        | 0.0934                                                    |
| C(11)               | 0.0009                        | 0.0799                                                    |
| C(12)               | 0.0259                        | 0.0167                                                    |
| S(13)               | 0.0019                        | 0.0009                                                    |
| N(14)               | 1.4971                        | 0.7485                                                    |
| C(15)               | 0.0000                        | 0.0171                                                    |
| C(16)               | 0.0000                        | 0.0171                                                    |
| C(17)               | 0.0000                        | 0.0171                                                    |
| C(18)               | 0.0000                        | 0.0171                                                    |
| N(19)               | 0.0002                        | 0.0217                                                    |
| N(20)               | 0.0002                        | 0.0216                                                    |

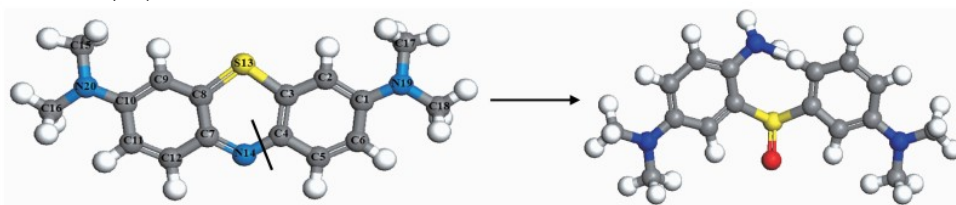

**Table S7.** Calculation of the frontier electron density of atoms in MO molecules by DFT analysis

| Atomic number in MO | $2\text{FED}_{\text{HOMO}}^2$ | $\text{FED}_{\text{HOMO}}^2 + \text{FED}_{\text{LUMO}}^2$ |
|---------------------|-------------------------------|-----------------------------------------------------------|
| C(1)                | 0.0858                        | 0.1376                                                    |
| C(2)                | 0.1488                        | 0.0859                                                    |
| C(3)                | 0.0308                        | 0.1156                                                    |
| C(4)                | 0.2989                        | 0.1525                                                    |
| C(5)                | 0.0237                        | 0.0822                                                    |
| C(6)                | 0.1960                        | 0.0982                                                    |
| N(7)                | 0.0484                        | 0.3723                                                    |
| N(8)                | 0.2867                        | 0.3800                                                    |
| C(9)                | 0.0204                        | 0.0798                                                    |
| C(10)               | 0.0725                        | 0.1275                                                    |
| C(11)               | 0.014                         | 0.0070                                                    |
| C(12)               | 0.0937                        | 0.1679                                                    |
| C(13)               | 0.0006                        | 0.0403                                                    |
| C(14)               | 0.0677                        | 0.0865                                                    |
| N(15)               | 0.6912                        | 0.4230                                                    |
| C(16)               | 0.0032                        | 0.0026                                                    |
| C(17)               | 0.0035                        | 0.0034                                                    |
| S(18)               | 0.0038                        | 0.0205                                                    |
| O(19)               | 0.0058                        | 0.0115                                                    |
| O(20)               | 0.0092                        | 0.0143                                                    |
| O(21)               | 0.0158                        | 0.0268                                                    |

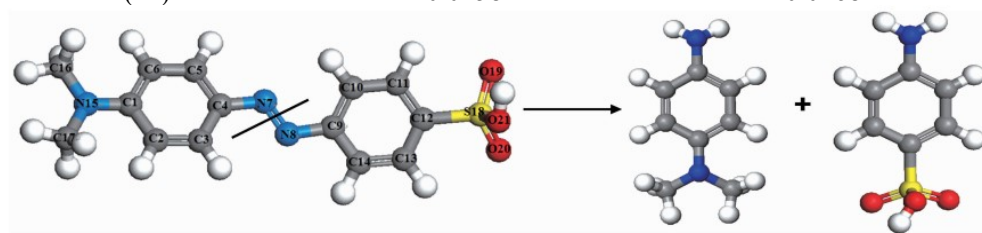

Supplement: d3nj02728g1.pdf [file d3nj02728g1.pdf]
